# Supplementary material for: Towards Standards for Human Fecal Sample Preparation in Targeted and Untargeted LC-HRMS Studies
Source: MDPI journal article supplement (doi:10.3390/metabo11060364), 2021-06-07
Supplement: s1 [file s1]

# Metabolites Journal

## Supplementary material

### Towards standards for human fecal sample preparation in targeted and untargeted LC-HRMS studies

Farideh Hosseinkhani <sup>1</sup>, Anne-Charlotte Dubbelman<sup>1</sup>, Naama Karu <sup>1, ,</sup> Amy C. Harms<sup>1</sup> and Thomas Hankemeier <sup>1,\*</sup>

<sup>1</sup> Division of System Biomedicine and Pharmacology, Leiden Academic Center for Drug Research, Leiden University, Leiden, Netherlands

\* Correspondence: [hankemeier@lacdr.leidenuniv.nl](mailto:hankemeier@lacdr.leidenuniv.nl); Tel.: +31715274226

| Supplementary Table S1. Standards information |        |            |                                |                           |        |            |                                |
|-----------------------------------------------|--------|------------|--------------------------------|---------------------------|--------|------------|--------------------------------|
| Mix 1-HILIC                                   |        |            |                                | Mix 2-reversed phase      |        |            |                                |
| Compound                                      | CHEBI  | Conc. (uM) | Supplier                       | Compound                  | CHEBI  | Conc. (uM) | Supplier                       |
| Aspartic acid                                 | 17053  | 80.0       | Sigma-Aldrich                  | FA (14:0)                 | 140940 | 50         | Merck                          |
| Betaine                                       | 17750  | 150        | Sigma-Aldrich                  | FA (16:0)                 | 140943 | 100        | Sigma                          |
| Citrulline                                    | 16349  | 50         | Sigma-Aldrich                  | FA (16:1)                 | 140944 | 25         | Fluka                          |
| Glutamic acid                                 | 16015  | 200        | Sigma-Aldrich                  | FA (17:0)                 | 140945 | 4          | Sigma-Aldrich                  |
| Glutamine                                     | 17061  | 500        | Fluka                          | FA (18:0)                 | 140947 | 25         | Sigma                          |
| Gamma-aminobutyric acid                       | 16865  | 4          | Sigma-Aldrich                  | FA (18:1)                 | 140948 | 25         | Sigma                          |
| Leucine                                       | 15603  | 100        | Fluka                          | FA (18:2)                 | 140949 | 25         | Sigma                          |
| Isoleucine                                    | 17191  | 100        | Fluka                          | FA (20:0)                 | 140951 | 20         | Sigma-Aldrich                  |
| Lysine                                        | 18019  | 400        | Fluka                          | FA (20:2)                 | 140952 | 10         | Sigma-Aldrich                  |
| Ornithine                                     | 15729  | 100        | Sigma-Aldrich                  | FA (20:4)                 | 132539 | 25         | Sigma                          |
| pipecolic acid                                | 17964  | 10         | Sigma-Aldrich                  | FA (20:5)                 | 132540 | 15         | Cayman chemicals               |
| Pyroglutamic acid                             | 16010  | 40         | Sigma-Aldrich                  | FA (22:0)                 | 140958 | 20         | Sigma-Aldrich                  |
| Taurine                                       | 15891  | 200        | Fluka                          | FA (22:1)                 | 132541 | 20         | Sigma-Aldrich                  |
| Adenosine                                     | 16335  | 0.5        | Fluka                          | FA (22:6)                 | 132544 | 20         | Cayman chemicals               |
| Adenine                                       | 16708  | 0.5        | ALFA AESAR                     | FA (24:0)                 | 155816 | 20         | Sigma-Aldrich                  |
| guanine                                       | 16235  | 4          | Sigma-Aldrich                  | UDCA                      | 9907   | 100        | Sigma                          |
| Hypoxanthine                                  | 17368  | 100        | Sigma-Aldrich                  | DCA                       | 28834  | 100        | Brunschwig                     |
| Inosine                                       | 17596  | 4          | Sigma-Aldrich                  | CA                        | 16359  | 100        | Brunschwig                     |
| Uric acid                                     | 27226  | 1000       | Sigma-Aldrich                  | GCDCA                     | 36274  | 100        | Sigma                          |
| Uracil                                        | 17568  | 4          | Sigma-Aldrich                  | GDCA                      | 27471  | 100        | Sigma                          |
| Lactic acid                                   | 422    | 1500       | Acros organics                 | TCDCA                     | 16525  | 100        | Sigma                          |
| Succinic acid                                 | 15741  | 50         | Sigma-Aldrich                  | TDCA                      | 9410   | 100        | Sigma                          |
| Pyruvic acid                                  | 32816  | 100        | Sigma-Aldrich                  | TCA                       | 28865  | 100        | Sigma                          |
| Pantothenic acid                              | 7916   | 6          | Sigma-Aldrich                  | SN1-LPC (18:1)            | 64566  | 40         | Avanti                         |
| Butyric acid                                  | 30772  | 2          | Sigma-Aldrich                  | SN1-LPC (18:2)            | 64549  | 40         | Avanti                         |
| 5-hydroxyhexanoic acid                        | 131434 | 6          | Sigma-Aldrich                  | LPE (18:0)                | 64576  | 20         | Avanti                         |
| <b>LPE(17:1)</b>                              | —      | 5          | Sigma-Aldrich                  | LPE (18:2)                | 91296  | 20         | Avanti                         |
| <b>DCA-d4</b>                                 | —      | 5          | Sigma-Aldrich                  | <b>D2-Glycine</b>         | —      | 10         | CDN Isotopes                   |
| <b>CA-d4</b>                                  | —      | 5          | CDN Isotopes                   | <b>D3 Leucine</b>         | —      | 10         | CDN Isotopes                   |
| <b>FA 20(4)-d8</b>                            | —      | 5          | Sigma-Aldrich                  | <b>D4 succinate</b>       | —      | 10         | Cambridge isotope laboratories |
| <b>FA 22 (6)-d5</b>                           | —      | 5          | Sigma-Aldrich                  | <b>U13-C5-valine</b>      | —      | 10         | Cambridge isotope laboratories |
| <b>D5-TUDCA</b>                               | —      | 5          | Sigma-Aldrich                  | <b>D6 Ornithine</b>       | —      | 10         | CDN Isotopes                   |
| <b>D4-GDCA</b>                                | —      | 5          | Sigma-Aldrich                  | <b>U 13C6- Lysine</b>     | —      | 10         | Cambridge isotope laboratories |
| <b>FA18(2) d4</b>                             | —      | 5          | Cambridge isotope laboratories | <b>D3-9-15N-aspartate</b> | —      | 10         | Cambridge isotope laboratories |

**Supplementary Table S2. LC MS conditions**

| Mode of separation                                                                                   | Analytical separation condition                                                                                                          | Solvents                                                                                                     | MS parameters                                                                                                                               |
|------------------------------------------------------------------------------------------------------|------------------------------------------------------------------------------------------------------------------------------------------|--------------------------------------------------------------------------------------------------------------|---------------------------------------------------------------------------------------------------------------------------------------------|
| Reversed phase-untargeted ( <b>method 1</b> )<br>Water ACQUITY UPLC T3 column (2.1 × 100 mm, 1.8 μm) | 0-3.5 min: 0.1 to 30% B, 3.5-8 min: 99.9% B, 8-12 min 99.9% B, 12.1-15 min: 0.1% B<br>Flow rate: 0.4 mL/ min<br>Column temperature: 40°C | A: water with 0.1% formic acid<br>B: MeCN with 0.1% formic acid                                              | Capillary voltage: 1500 V, sample cone voltage: 30 V, source temperature: 125 °C, desolvation temperature: 300 °C, desolvation gas: 500 L/h |
| Reversed phase- lipids ( <b>method 2</b> )<br>Water ACQUITY UPLC T3 column (2.1 × 100 mm, 1.8 μm)    | 0-7.5 min: 0.1 to 99.9% B, 7.5-11.5 min: 99.9% B, 11.6-15 min: 0.1% B<br>Flow rate: 0.4 mL/ min<br>Column temperature: 45°C              | A: 5:95 MeCN: water with 10 mM Ammonium formate<br>B: MeOH with 10 mM Ammonium formate                       |                                                                                                                                             |
| HILIC-polar targeted ( <b>method 3</b> )<br>SeQuant® ZIC-cHILIC (2.1 × 100 mm, 3 μm)                 | 0-9.16 min: 0.1 to 75% B, 9.16-14 min 100% B, 14.1-20 min: 0.1% B<br>Flow rate: 0.25 mL/ min<br>Column temperature: 30°C                 | A: 90% MeCN and 10% water with 5 mM ammonium formate<br>B: 10% MeCN and 90% water with 5 mM ammonium formate | Capillary voltage: 2000 V, sample cone voltage: 45 V, source temperature: 80 °C, desolvation temperature: 250°C, desolvation gas: 500 L/h   |

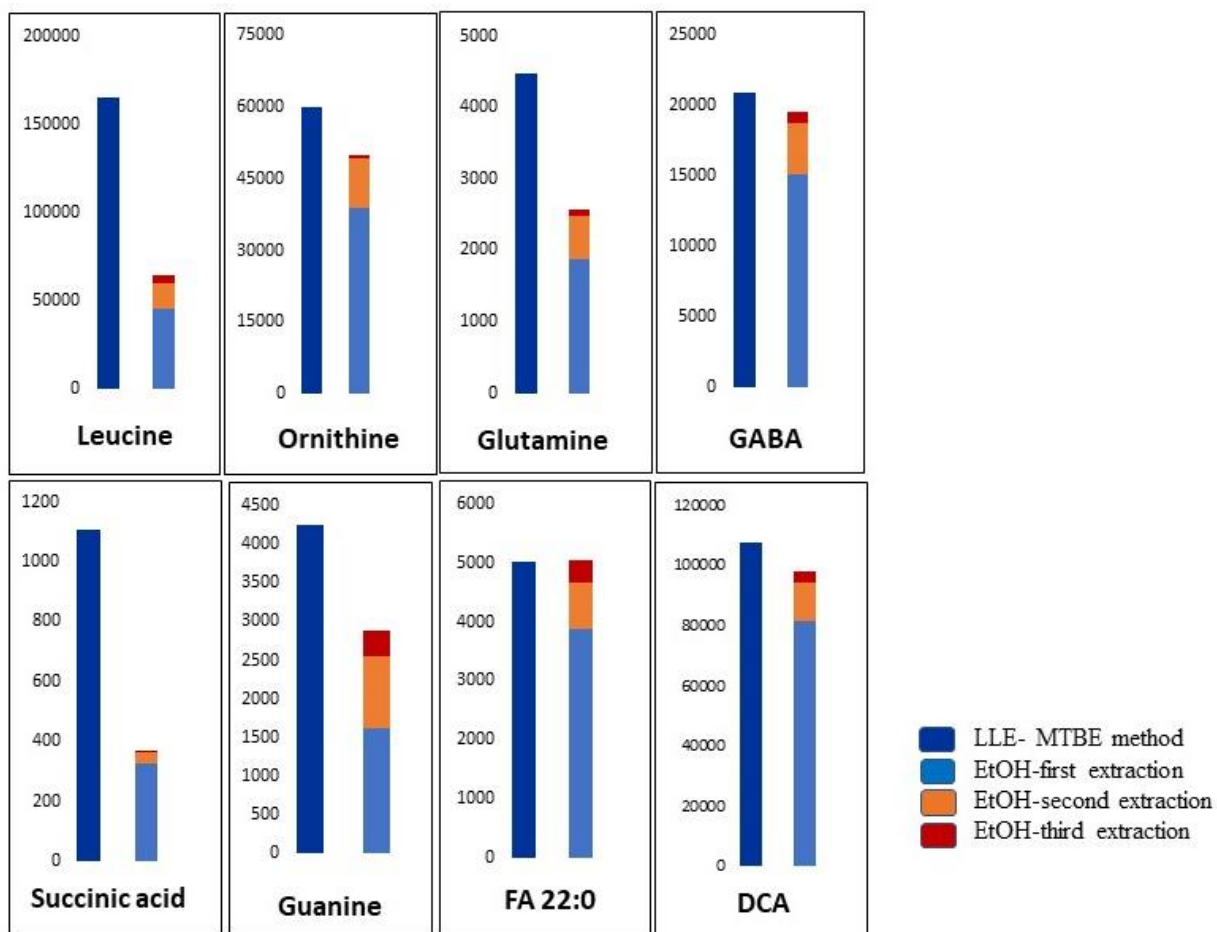

**Supplementary Figure S1.** Comparison of the LLE metabolic yield between MTBE and three cycles of single-phase ethanol extraction (accumulated bar).

**Supplementary Table S5.** List of parameters used for untargeted data processing with XCMS

| <b>Feature detection</b>            |          |
|-------------------------------------|----------|
| Method                              | CentWave |
| ppm                                 | 5        |
| snthr                               | 10       |
| peakwidth                           | (3, 8)   |
| mzdiff                              | 0.01     |
| prefilter peaks                     | 3        |
| prefilter intensity                 | 1000     |
| noise                               | 1000     |
| <b>Retention time correction</b>    |          |
| method                              | orbiwarp |
| profStep                            | 1        |
| <b>Grouping</b>                     |          |
| method                              | density  |
| bw                                  | 5        |
| mzwid                               | 0.01     |
| minfrac                             | 0.5      |
| minsample                           | 3        |
| <b>Annotation</b>                   |          |
| feature.Annotation.CAMERA.annotate  | isotopes |
| feature.Annotation.CAMERA.mzabs     | 0.01     |
| feature.Annotation.CAMERA.ppm       | 5        |
| feature.Annotation.CAMERA.sigma     | 6        |
| feature.Annotation.CAMERA.perfwhm   | 0.6      |
| feature.Annotation.CAMERA.maxcharge | 3        |
| feature.Annotation.CAMERA.maxiso    | 5        |
| feature.Annotation.CAMERA.intensity | Maxo     |

**Supplementary Table S6.** Process of untargeted feature filtering. The number detailed per extraction in each step denotes the features removed in that step.

| <b>Cleaning process</b>                       | <b>MTBE</b> | <b>Chloroform</b> | <b>EtOH</b> | <b>MeOH</b> | <b>MeOH<br/>-Water</b> | <b>Water</b> |
|-----------------------------------------------|-------------|-------------------|-------------|-------------|------------------------|--------------|
| Total features detected by XCMS               | 9830        |                   |             |             |                        |              |
| Removal of features with $rt > 7\text{min}$   | 2088        | 2088              | 2086        | 2088        | 2086                   | 2086         |
| Removal of $m/z > 900$                        | 718         | 718               | 718         | 718         | 718                    | 718          |
| Removal of isotopes                           | 1237        | 1213              | 1216        | 1211        | 1179                   | 1112         |
| removal of non-biological peaks<br>(by blank) | 293         | 448               | 402         | 416         | 550                    | 847          |
| Features with $RSD > 35\%$ *                  | 267         | 217               | 260         | 293         | 271                    | 264          |
| consolidating features per<br>retention time  | 3208        | 3047              | 3067        | 3038        | 2960                   | 3604         |
| Final features                                | 2109        | 2099              | 2081        | 2066        | 2066                   | 1199         |

\*In a case of features with low intensity, no removal based on %RSD was applied

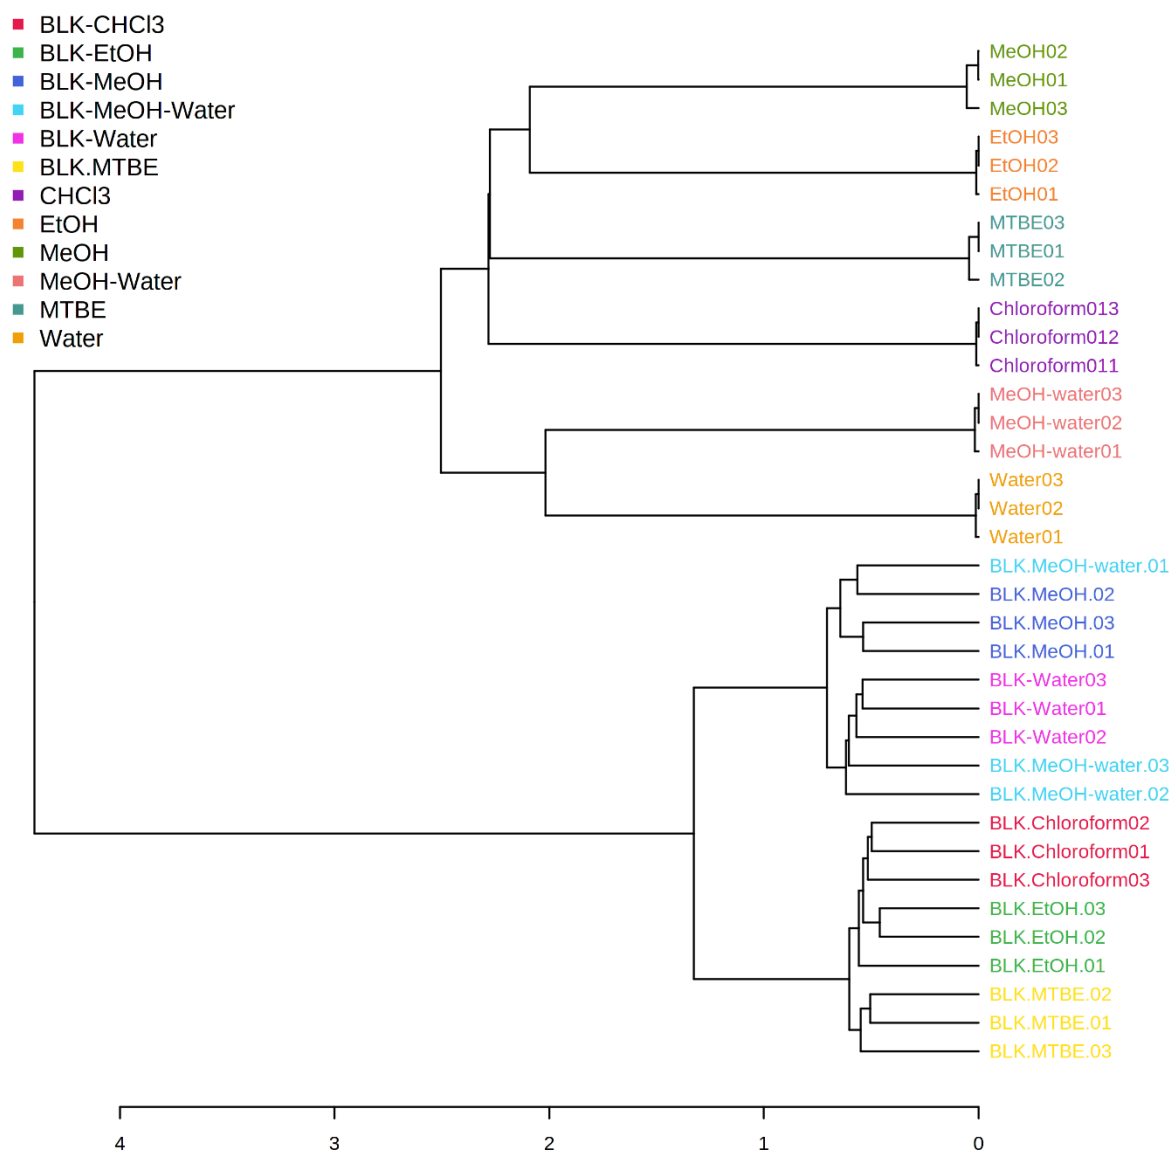

**Supplementary Figure S2.** Hierarchical analysis of the various extraction procedures, with n=3 replicates each. Clustering was performed based on the Pearson distance and average linkage, on log-transformed and pareto-scaled data. BLK, blank.

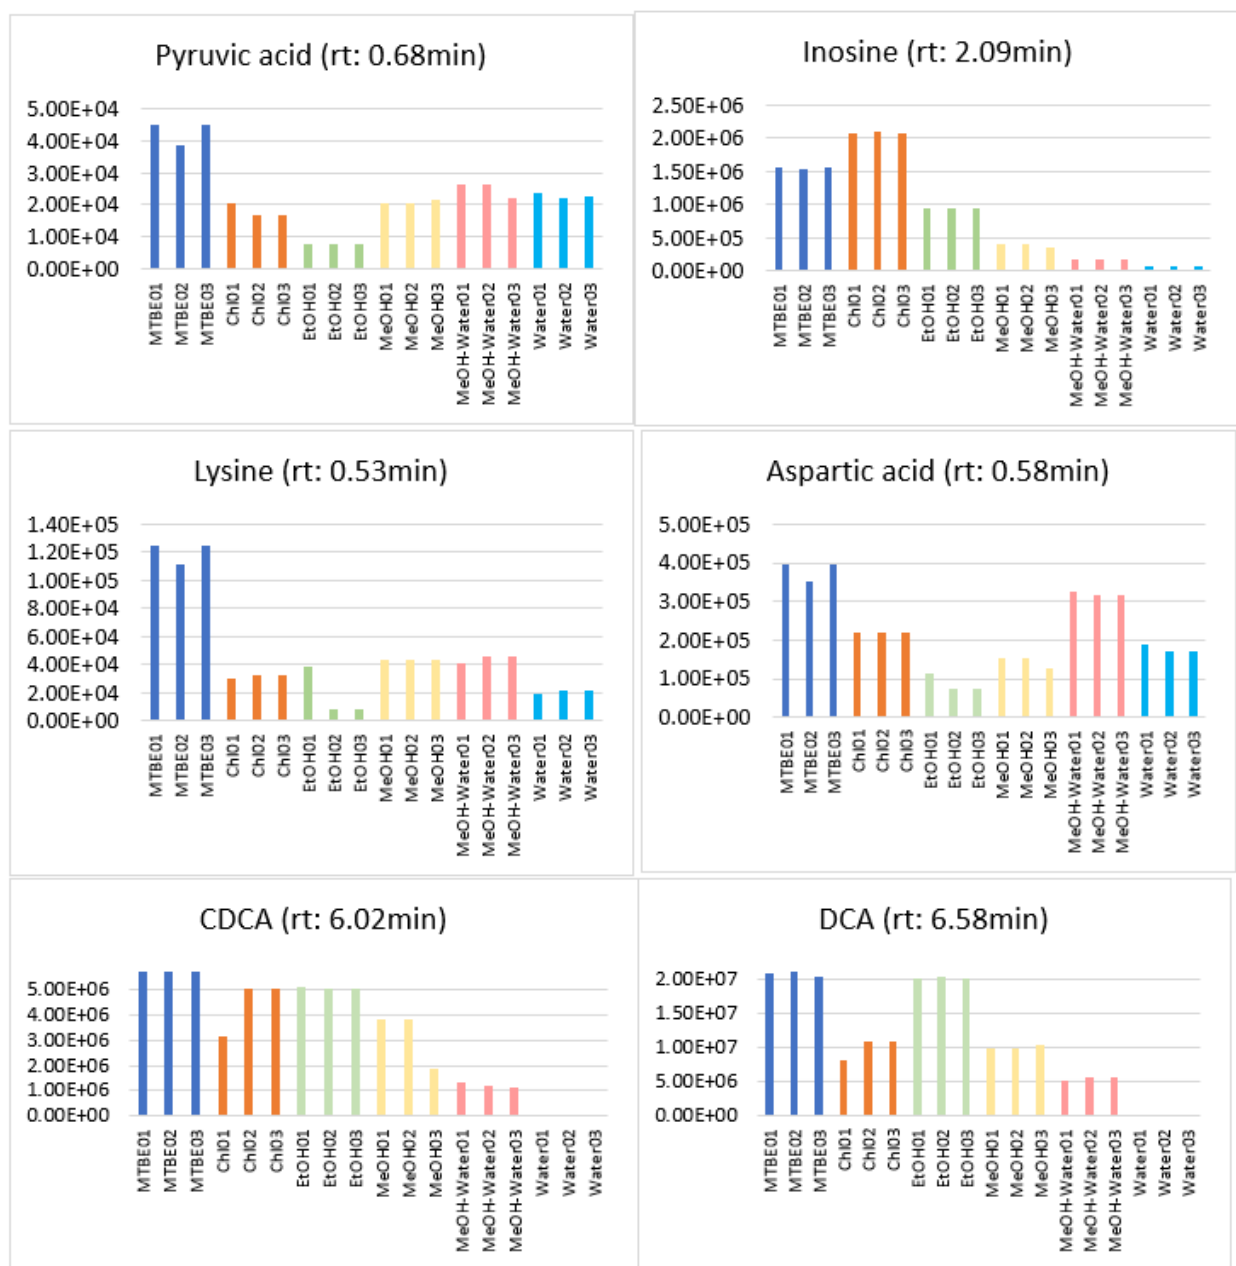

**Supplementary Figure S3.** Example of the peak area between different extraction methods (LLE versus single phase extraction) in untargeted analysis. Organic solvents exhibit low yield of polar metabolites in the early part of chromatography, and high(er) yield of late eluters.



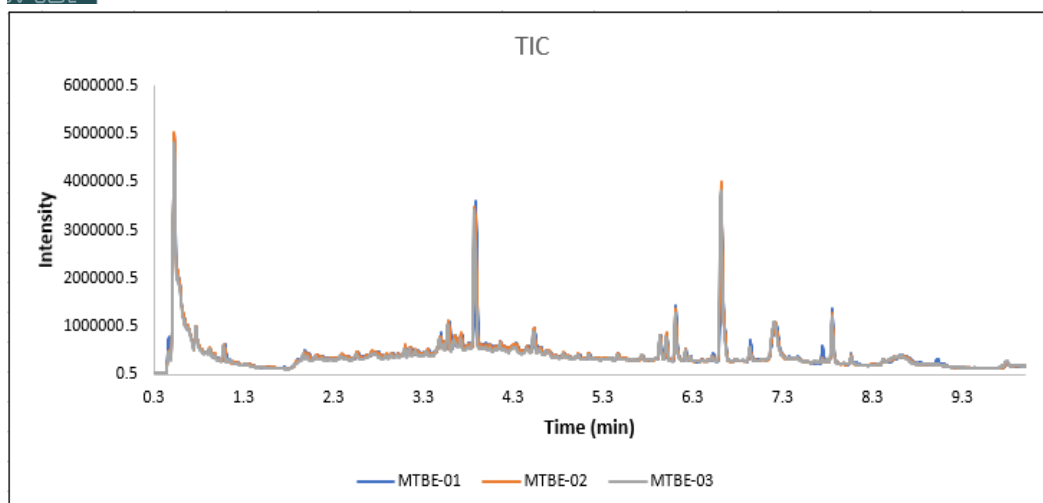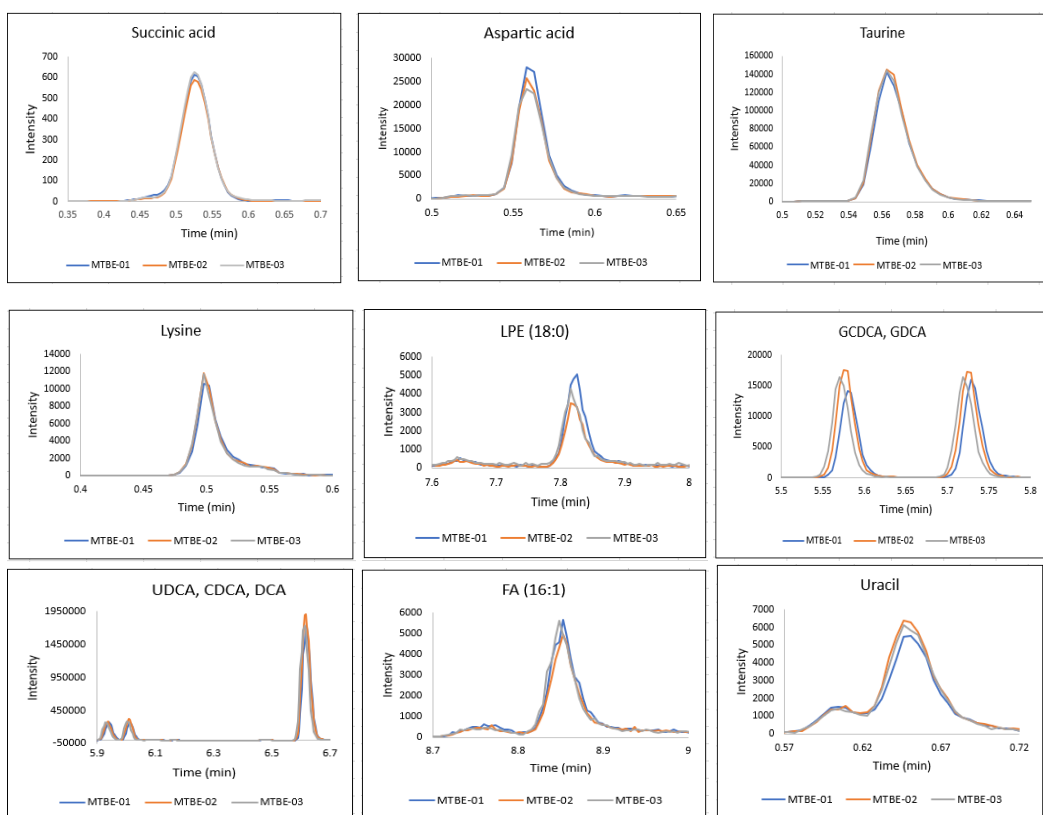

**Supplementary Figure S4.** The overlaid total ion chromatograms and extracted ion chromatograms of 3 different MTBE extractions on the same fecal sample

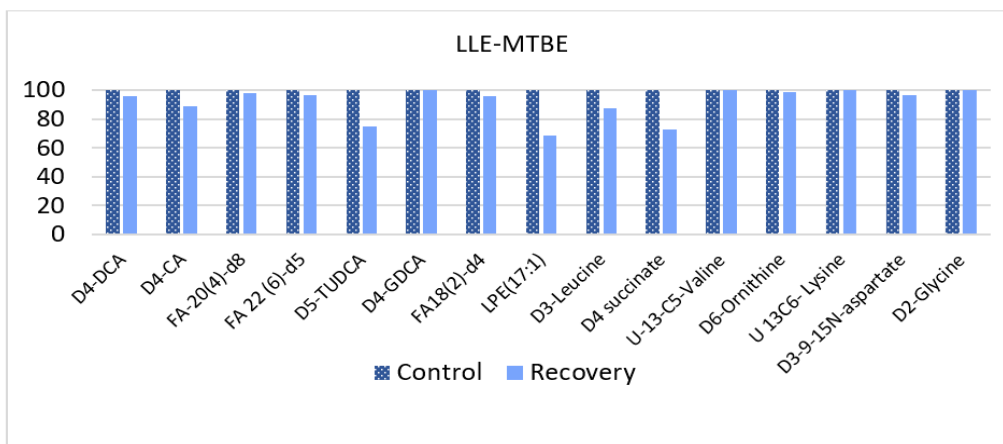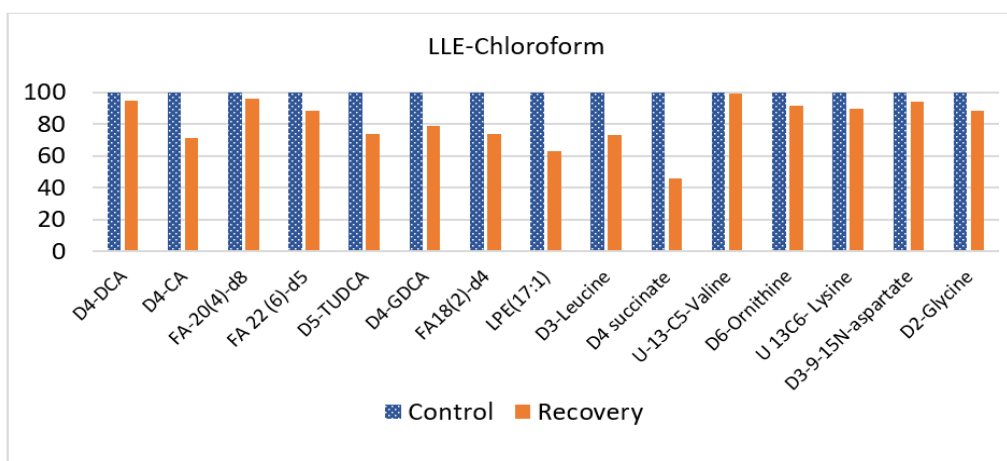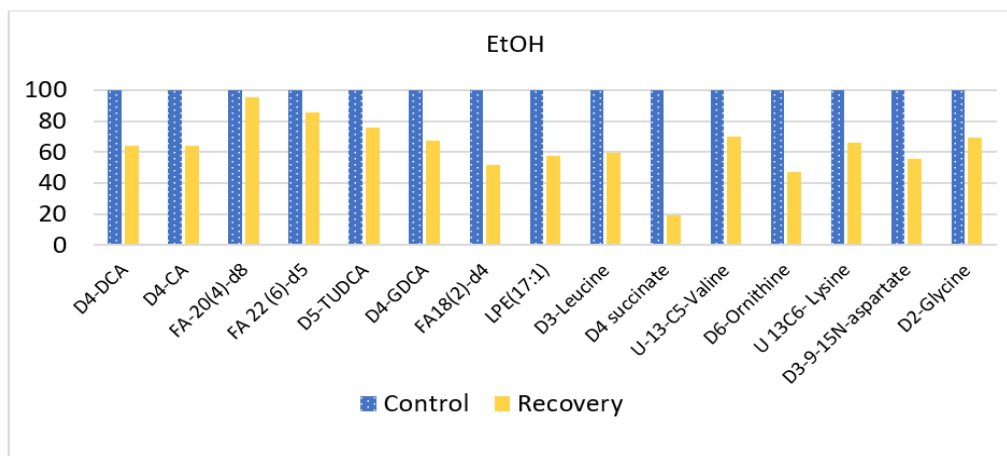

**Supplementary Figure S5.** Extraction recovery (% of starting material) for internal standards, following extraction with EtOH, chloroform and MTBE. The control sample represents the concentration of internal standard spiked post extraction.
